# Supplementary material for: Both mass ratio effects and community diversity drive biomass production in a grassland experiment
Source: PubMed Central journal article supplement (PMC6372655; doi:10.1038/s41598-018-37190-6), 2019-02-12
Supplement: 41598_2018_37190_MOESM1_ESM.pdf [file 41598_2018_37190_MOESM1_ESM.pdf]

## Both mass ratio effects and community diversity drive biomass production in a grassland experiment

Judit Sonkoly, András Kelemen, Orsolya Valkó, Balázs Deák, Réka Kiss, Katalin Tóth,  
Tamás Miglécz, Béla Tóthmérész & Péter Török

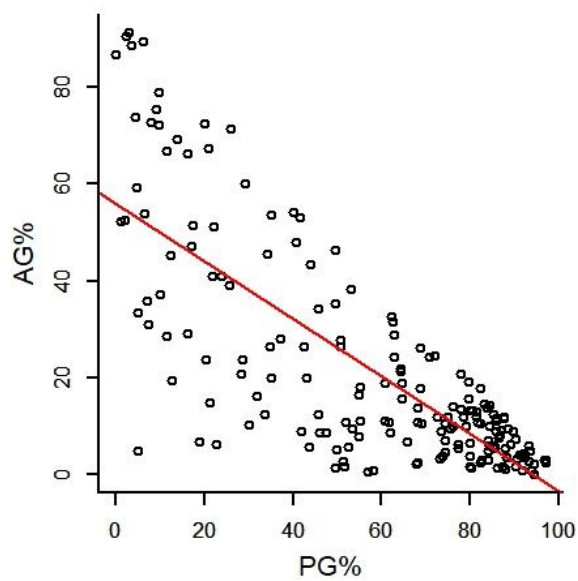

**Figure S1.** The relationship of the proportion of annual grasses' biomass (AG%) and perennial grasses' biomass (PG%) (Spearman rank correlation,  $\rho=-0.761$ ).

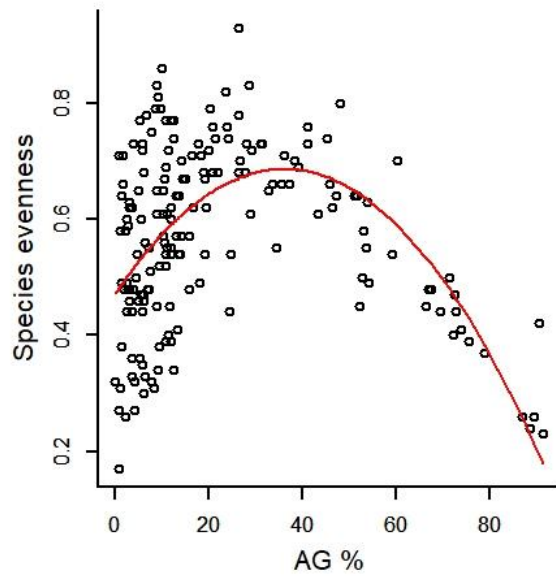

**Figure S2.** The effect of the proportion of annual grasses' biomass (AG%) on species evenness (second order polynomial model,  $R^2=0.337$ ).
