# Supplementary material for: Both mass ratio effects and community diversity drive biomass production in a grassland experiment
Source: PubMed Central journal article supplement (PMC6372655; doi:10.1038/s41598-018-37190-6), 2019-02-12
Supplement: 41598_2018_37190_MOESM2_ESM.pdf [file 41598_2018_37190_MOESM2_ESM.pdf]

## Both mass ratio effects and community diversity drive biomass production in a grassland experiment

Judit Sonkoly, András Kelemen, Orsolya Valkó, Balázs Deák, Réka Kiss, Katalin Tóth, Tamás Miglécz, Béla Tóthmérész & Péter Török

**Table S1.** Correlations between the different facets of biodiversity (Pearson correlation, significant results are marked with bold).

|          | Species richness                      | Evenness | FRic                              | FEve    |
|----------|---------------------------------------|----------|-----------------------------------|---------|
| Evenness | p=0.085                               |          |                                   |         |
| FRic     | <b>p&lt;2.2e-16</b><br><b>r=0.705</b> | p=0.083  |                                   |         |
| FEve     | p=0.399                               | p=0.226  | <b>p=0.011</b><br><b>r=-0.173</b> |         |
| FDiv     | p=0.253                               | p=0.374  | <b>p=0.039</b><br><b>r=-0.141</b> | p=0.143 |
